# Supplementary material for: A Systematic Review of Sleep–Wake Disorder Diagnostic Criteria Reliability Studies
Source: MDPI journal article supplement (doi:10.3390/biomedicines10071616), 2022-07-06
Supplement: s1 [file s1]

**Table S2. Description of the included studies evaluating the reliability of Sleep-Wake diagnostic criteria.**

| <i>General description</i>                         |                                                                                           |                                                                          |                                            | <i>Modality of diagnostic evaluation</i>                        |                                                                                              |                                        |                                                                                               |                                                                    | <i>Cohen's kappa coefficient evaluation</i>                                                                       |                                      |                                                                                                                                                                                                                                                                       |                                                                   |
|----------------------------------------------------|-------------------------------------------------------------------------------------------|--------------------------------------------------------------------------|--------------------------------------------|-----------------------------------------------------------------|----------------------------------------------------------------------------------------------|----------------------------------------|-----------------------------------------------------------------------------------------------|--------------------------------------------------------------------|-------------------------------------------------------------------------------------------------------------------|--------------------------------------|-----------------------------------------------------------------------------------------------------------------------------------------------------------------------------------------------------------------------------------------------------------------------|-------------------------------------------------------------------|
| First Author / Year / Country / Journal            | Monocentric / Multicentric                                                                | Main category and Sleep-Wake disorders evaluated*                        | Classification use for diagnostic criteria | Number of clinical interviews performed with a patient          | Characteristics and numbers of raters                                                        | Types of clinical interviews           | Modality of diagnostic conclusion                                                             | Reliability guidelines                                             | Modality of diagnosis comparison between raters, number of patients, and number of clinical judgement conclusions | Number of Cohen's kappa coefficients | Cohen's kappa coefficient (N = 69) and number of patients with the diagnosis                                                                                                                                                                                          | Mean Kappa Coefficient of the main Sleep-Wake categories (N = 41) |
| Vignatelli et al. / 2002 / Sleep / Italia          | Multicentric (N = not reported) (Sleep Centers of National Association of Sleep Medicine) | Central Disorders of Hypersomnolence (Narcolepsy)                        | ICSD-R (1997)                              | 1                                                               | 7 resident neurologists or psychiatrists and 10 trainees' neurologists or neurophysiologists | Semi-structured face-to-face interview | By physician watching the videotaped based on the ICSD-R without and with a previous training | Guidelines for Reporting Reliability and Agreement Studies (GRRAS) | Comparison of 17 diagnostics on 10 videotapes (N = 170 diagnosis conclusion)                                      | 2                                    | Kappa = 0.61 (before training), 0.95 (after training, N = 4)                                                                                                                                                                                                          | Mean Kappa of Central Disorders of Hypersomnolence = 0.78         |
| Loddo et al. / 2019 / Sleep and Breathing / Italia | Monocentric (Sleep Disorder Center of the Institute of Neurological Science of Bologna)   | Parasomnia Disorders (Disorders of arousal)                              | ICSD-3 (2014)                              | 3                                                               | 1 neurologist resident and 2 general practitioners                                           | Semi-structured face-to-face interview | By each physician at the end of their interview                                               | No                                                                 | Comparison of 3 diagnostics on 126 patients (N = 378 diagnosis conclusion)                                        | 3                                    | Kappa = 0.89 (Confusional Arousal; N = 3); 0.87 (Sleepwalking; N = 2); 0.87 (Sleep terrors; N = 2)                                                                                                                                                                    | Mean Kappa of Parasomnia Disorders = 0.88                         |
| Vignatelli et al. / 2005 / J. Neurol. / Italia     | Monocentric (Sleep Disorder Center of the Institute of Neurological Science of Bologna)   | Parasomnias Disorders (Disorders of Arousal; NREM Parasomnias Disorders) | ICSD-R (1997)                              | 2 evaluations for 39 patients and 3 evaluations for 11 patients | 2 general neurologists and 1 general practitioner                                            | Semi-structured face-to-face interview | Automatically generated at the end of the interview                                           | No                                                                 | Comparison of 2 or 3 diagnostics on 50 patients (N = 111 diagnosis conclusion)                                    | 13                                   | Kappa = Confusional Arousals: 0.74; Sleep terrors: -0.02; Sleepwalking: 0.36; Nightmares: 0.25; RBD: 0.46; Sleep paralysis: 0.69<br>N of positive diagnostic = [4.5 – 42] by disorder<br><br>(Not considered: Nocturnal leg cramps: 0.78; Rhythmic movement disorder: | Mean Kappa of Parasomnias Disorders = 0.41                        |

|                                                                 |                                                                                           |                                                           |                                                                 |   |                                                                                           |                                                                                                                                     |                                                                                                                                                                                |    |                                                                                                                             |   |                                                                                                                                 |                                                                                                                            |
|-----------------------------------------------------------------|-------------------------------------------------------------------------------------------|-----------------------------------------------------------|-----------------------------------------------------------------|---|-------------------------------------------------------------------------------------------|-------------------------------------------------------------------------------------------------------------------------------------|--------------------------------------------------------------------------------------------------------------------------------------------------------------------------------|----|-----------------------------------------------------------------------------------------------------------------------------|---|---------------------------------------------------------------------------------------------------------------------------------|----------------------------------------------------------------------------------------------------------------------------|
|                                                                 |                                                                                           |                                                           |                                                                 |   |                                                                                           |                                                                                                                                     |                                                                                                                                                                                |    |                                                                                                                             |   | 1.00; Sleep starts: 0.41; Sleep talking: 0.72; Primary snoring: 0.88; Sleep bruxism: 0.77; Sleep enuresis: 0.73)                |                                                                                                                            |
| Vignatelli et al. / 2003 / J. Sleep Res. / Italy                | Multicentric (N = not reported) (Sleep Centers of National Association of Sleep Medicine) | Parasomnia Disorders (REM Sleep Behavior Disorder)        | ICSD-R (1997)                                                   | 1 | 6 physicians (with no information on the background of the physicians)                    | Semi-structured face-to-face interview                                                                                              | By physician watching the videotaped based on the ICSD-R                                                                                                                       | No | Comparison of 6 diagnostics on 10 videotapes (N = 60 diagnosis conclusion)                                                  | 1 | Kappa = 0.65 (N = 5)                                                                                                            | Mean Kappa of Parasomnias Disorders = 0.65                                                                                 |
| Hening et al. / 2008 / Sleep Medicine / USA                     | Monocentric (Hopkins Bayview Medical Center)                                              | Sleep-Related Movement Disorders (Restless Legs Syndrome) | IRLSSG, 1995                                                    | 3 | 1 sleep specialist and 1 non sleep specialist                                             | Semi-structured face-to-face interview (and structured telephone interview with the HTDI)                                           | By sleep specialists at the end of their interview (and automatically generated with HTDI)                                                                                     | No | Comparison of 2 diagnostics (and comparison between a physician interview based on the HTDI) (N = 124 diagnosis conclusion) | 1 | Kappa = 0.87 between the two physicians (and Kappa not computed between the HTDI and the physician) (N = 63)                    | Mean Kappa of Sleep-Related Movement Disorders = 0.87                                                                      |
| Chung et al. / 2014 / Journal of Psychosomatic Research / China | Monocentric (University of Hong-Kong, Department of Psychiatry)                           | Insomnia Disorders                                        | DSM-IV-TR (2000) + ICSD-2 (2005) + ICD-10 (1992) + DSM-5 (2013) | 2 | 2 psychiatrists and interviewers (N not reported)                                         | Semi-structured telephone interview (psychiatrists) and structured lay-administered telephone interview with the BIQ (interviewers) | Automatically generated (with BIQ) and by each physician at the end of their interview                                                                                         | No | Comparison of the clinician diagnosis with the BIQ diagnosis on 176 patients (N = 352 diagnosis conclusion)                 | 4 | Kappa = DSM-5 = 0.58; DSM-IV-TR = 0.72; ICD-10 = 0.48; ICSD-2 = 0.60 (number of patients with confirmed disorders not reported) | Mean Kappa of DSM-5 = 0.58<br>Mean Kappa of DSM-IV-TR = 0.72<br>Mean Kappa of ICD-10 = 0.48<br>Mean Kappa of ICSD-2 = 0.60 |
| Edinger et al. / 1996 / Sleep / USA                             | Monocentric (Duke University Medical Center)                                              | Insomnia Disorders                                        | DSM-III-R (1987) + ICSD-1 (1990)                                | 2 | 2 sleep specialists                                                                       | Unstructured interviews conducted by a psychiatrist or a clinical psychologist                                                      | By 1) clinical interviews conducted by the psychiatrist and the clinical psychologist 2) and by the sleep specialist on the clinical data (and on PSG and sleep questionnaire) | No | Comparison of 2 diagnostics on 31 patients (N = 62 diagnosis conclusion)                                                    | 2 | Kappa = 0.71 for DSM-III-R, 0.68 for ICSD-1 (N = number of patients with confirmed disorders not reported)                      | Mean Kappa of for DSM-III-R = 0.71<br>Mean Kappa of ICSD-1 = 0.68                                                          |
| Kessler et al. / 2010 / Sleep / USA                             | Multicentric (N = not reported)                                                           | Insomnia Disorders                                        | DSM-IV-TR (2000) + ICSD-2 (2005) + ICD-10 (1992)                | 2 | 7 psychologists with a specialization in sleep medicine and interviewers (N not reported) | Semi-structured telephone interview (psychologists) and structured lay-administered telephone interview with the BIQ (interviewers) | Automatically generated (with BIQ) and by each physician at the end of their interview                                                                                         | No | Comparison of the clinician diagnosis with the BIQ diagnosis on 203 patients (N = 406 diagnosis conclusion)                 | 3 | Kappa = DSM-IV-TR = 0.72; ICD-10 = 0.40; ICSD-2 = 0.42 (N = number of patients with confirmed disorders not reported)           | Mean Kappa of DSM-IV-TR = 0.72<br>Mean Kappa of ICD-10 = 0.40<br>Mean Kappa of ICSD-2 = 0.42                               |

|                                                     |                                                                                                                                         |                                                                                                                                                                                                                 |                                  |   |                                                                                                |                                                                                                        |                                                 |                                                                                                  |                                                                                                                                                                                                                |   |                                                                                                                                                                                                                                                                                                                                                                                                                                      |                                                                                                                                                                                                                      |
|-----------------------------------------------------|-----------------------------------------------------------------------------------------------------------------------------------------|-----------------------------------------------------------------------------------------------------------------------------------------------------------------------------------------------------------------|----------------------------------|---|------------------------------------------------------------------------------------------------|--------------------------------------------------------------------------------------------------------|-------------------------------------------------|--------------------------------------------------------------------------------------------------|----------------------------------------------------------------------------------------------------------------------------------------------------------------------------------------------------------------|---|--------------------------------------------------------------------------------------------------------------------------------------------------------------------------------------------------------------------------------------------------------------------------------------------------------------------------------------------------------------------------------------------------------------------------------------|----------------------------------------------------------------------------------------------------------------------------------------------------------------------------------------------------------------------|
| Edinger et al. / 2011 / Arch. Gen. Psychiatry / USA | Multicentric (N = 2) (Duke University Medical Center and Rush University Medical Center)                                                | Insomnia Disorders                                                                                                                                                                                              | DSM-IV-TR (2000) + ICSD-2 (2005) | 2 | 6 sleep specialists                                                                            | Structured face-to-face sleep interview with the DCSID or unstructured face-to-face clinical interview | By each physician at the end of their interview | Convergent and discriminant validation by the multitrait-multimethod matrix (Campbell and Fiske) | Comparison of 2 diagnostics on patients interviewed with the DCSID or 2 diagnostics on patients interviewed with an unsupervised interview (Number of patients and clinical diagnosis conclusion not reported) | 8 | Structured interviews with the DSM-IV-TR: Kappa = 0.44 for Duke and Kappa = 0.08 for Rush; Unstructured interviews with the DSM-IV-TR: Kappa = 0.43 for Duke and Kappa = 0.14 for Rush / Structured interviews with the ICSD-2: Kappa = 0.51 for Duke and Kappa = 0.34 for Rush; Unstructured interviews with the ICSD-2: Kappa = 0.52 for Duke and Kappa = 0.12 for Rush (number of patients with confirmed disorders not reported) | Mean Kappa of DSM-IV-TR = 0.25<br>Mean Kappa of ICSD-2 = 0.74                                                                                                                                                        |
| Morin et al. / 1994 / Behavior Therapy / USA        | Monocentric (Sleep Medical Center of the Virginia Commonwealth University)                                                              | Insomnia Disorders                                                                                                                                                                                              | ICSD-1 (1990)                    | 2 | 2 clinicians (with no information on their background)                                         | Semi-structured face-to-face interview                                                                 | By each clinician at the end of their interview | No                                                                                               | Comparison of 2 diagnostics on 20 patients (N = 40 diagnosis conclusion)                                                                                                                                       | 3 | Kappa = Psychophysiological insomnia: 0.54; Insomnia associated with psychopathology: 0.64; Drug dependent insomnia: 0.70 (number of patients with confirmed disorders not reported)                                                                                                                                                                                                                                                 | Mean Kappa of Insomnia Disorders = 0.63                                                                                                                                                                              |
| Schramm et al. / 1993 / Am. J. Psychiatry / Germany | Multicentric (N = 3) (Göttingen sleep laboratory, Sleep disorders center in Landeck and Central Institute of Mental Health in Mannheim) | 6 Main Categories (Insomnia disorder, Central Disorder of Hypersomnolence, Sleep Related Breathing Disorders, Sleep Related Movement Disorders, Circadian Rhythm Sleep-Wake Disorders and Parasomnia Disorders) | DSM-III-R (1987)                 | 2 | 5 psychologists with special knowledge of sleep medicine and 2 psychiatrists without knowledge | Structured face-to-face interviews (SIS-D)                                                             | By each clinician at the end of their interview | No                                                                                               | Comparison of 2 diagnostics on 68 patients (N = 136 diagnosis conclusion)                                                                                                                                      | 8 | Kappa = All insomnias: 0.91; All hypersomnias: 0.90; All CWSID: 0.79; Sleepwalking disorder: 0.79; Primary insomnia: 0.86; Sleep-induced respiratory impairment: 0.64; Restless Leg Syndrome: 0.85; Narcolepsy: 0.88 (N = [5 – 54])                                                                                                                                                                                                  | Mean Kappa of Insomnia Disorders = 0.88<br>Mean Kappa of Central hypersomnolence Disorders = 0.90<br>Mean Kappa of Sleep related breathing Disorders = 0.64<br>Mean Kappa of Sleep related movement Disorders = 0.85 |

|                                                         |                                                                                                                                                                                                                                                                                                           |                                                                                                                                                                                                                 |               |   |                                                                                                                                           |                                        |                                                                                                       |    |                                                                                                                                 |   |                                                                                                                                     |                                                                                                                                          |
|---------------------------------------------------------|-----------------------------------------------------------------------------------------------------------------------------------------------------------------------------------------------------------------------------------------------------------------------------------------------------------|-----------------------------------------------------------------------------------------------------------------------------------------------------------------------------------------------------------------|---------------|---|-------------------------------------------------------------------------------------------------------------------------------------------|----------------------------------------|-------------------------------------------------------------------------------------------------------|----|---------------------------------------------------------------------------------------------------------------------------------|---|-------------------------------------------------------------------------------------------------------------------------------------|------------------------------------------------------------------------------------------------------------------------------------------|
|                                                         |                                                                                                                                                                                                                                                                                                           |                                                                                                                                                                                                                 |               |   |                                                                                                                                           |                                        |                                                                                                       |    |                                                                                                                                 |   |                                                                                                                                     | Mean Kappa of Circadian rhythm sleep-wake disorders = 0.79<br><br>Mean Kappa of Parasomnia disorders = 0.88                              |
| Buysse et al. / 1994 / Am. J. Psychiatry / USA          | Multicentric (N = 5) (Montefiore Medical Center of the Albert Einstein College of Medicine, New-York; Hershey Medical Center of Pennsylvania State University; Western Psychiatric Institute and Clinic University of Pittsburgh School of Medicine; Henry Ford Hospital Detroit; Mayo Clinic, Rochester. | 2 Main Categories (Insomnia disorder, Sleep Related Breathing Disorders)                                                                                                                                        | DSM-IV (1994) | 2 | 5 sleep specialists and 53 non sleep specialists                                                                                          | Unstructured face-to-face interviews   | By each clinician at the end of their interview                                                       | No | Comparison of 2 diagnostics (between sleep specialist and non sleep specialists) on 216 patients (N = 432 diagnosis conclusion) | 3 | Kappa = Primary insomnia: 0.40; Sleep Related Breathing Disorders: 0.57; Insomnia related to mental disorder: 0.42 (N = [14 – 172]) | Mean Kappa of Insomnia disorder = 0.41<br><br>Mean Kappa of Sleep related breathing disorders = 0.57                                     |
| Taylor et al. / 2018 / J. of Clin. Sleep Medicine / USA | Multicentric (N = not reported)                                                                                                                                                                                                                                                                           | 6 Main Categories (Insomnia disorder, Central Disorder of Hypersomnolence, Sleep Related Breathing Disorders, Sleep Related Movement Disorders, Circadian Rhythm Sleep-Wake Disorders and Parasomnia Disorders) | DSM-5 (2013)  | 1 | 8 graduate and PhD-level evaluators with no prior training in sleep medicine (but they completed a 3-hour training led on the SCISD used) | Structured telephone interview (SCISD) | By 1) evaluator conducting the telephone interview 2) and by an evaluator based on an audio-recording | No | Comparison of 106 diagnostics obtain by the telephone interview and by the audio band evaluation (N = 212 diagnosis conclusion) | 6 | Kappa = Insomnia: 1.00; Hypersomnolence: 0.50; CRSWD: 0.50; Nightmare: 0.78; RLS: 0.83; OSAS: 0.73 (N = [7 – 93])                   | Mean Kappa of Insomnia Disorders = 1.00<br><br>Mean Kappa of Central hypersomnolence Disorders = 0.50<br><br>Mean Kappa of Sleep related |

|                                                 |                                                                                                                           |                                                                                                                                                                                                                 |               |   |                                                                                          |                                                                                                                                   |                                                                                                  |    |                                                                                                                             |   |                                                                                                                                                                                                                      |                                                                                                                                                                                                                                                                                                    |
|-------------------------------------------------|---------------------------------------------------------------------------------------------------------------------------|-----------------------------------------------------------------------------------------------------------------------------------------------------------------------------------------------------------------|---------------|---|------------------------------------------------------------------------------------------|-----------------------------------------------------------------------------------------------------------------------------------|--------------------------------------------------------------------------------------------------|----|-----------------------------------------------------------------------------------------------------------------------------|---|----------------------------------------------------------------------------------------------------------------------------------------------------------------------------------------------------------------------|----------------------------------------------------------------------------------------------------------------------------------------------------------------------------------------------------------------------------------------------------------------------------------------------------|
|                                                 |                                                                                                                           |                                                                                                                                                                                                                 |               |   |                                                                                          |                                                                                                                                   |                                                                                                  |    |                                                                                                                             |   |                                                                                                                                                                                                                      | breathing Disorders = 0.73<br><br>Mean Kappa of Sleep related movement Disorders = 0.83<br><br>Mean Kappa of Circadian rhythm sleep-wake disorders = 0.50<br><br>Mean Kappa of Parasomnia disorders = 0.78                                                                                         |
| Ohayon et al. / 1999 / Sleep / USA              | Multicentric (N = 2) (Sleep Disorder Center of Stanford University and Regensburg University)                             | 4 Main Categories (Insomnia disorder, Sleep Related Breathing Disorders, Central Disorder of Hypersomnolence, Parasomnia disorders)                                                                             | ICSD-1 (1990) | 2 | 9 sleep specialists and 2 non-specialists                                                | Unstructured face-to-face interviews (sleep specialists) and structured face-to-face interviews with Sleep-EVAL (non-specialists) | Automatically generated (with Sleep-EVAL) and by sleep specialists at the end of their interview | No | Comparison of the sleep specialist's diagnosis with the Sleep-EVAL diagnosis on 105 patients (N = 210 diagnosis conclusion) | 4 | Kappa = OSAS: 0.94 (N = 40); Insomnia Disorders: 0.78 (N = 6); Narcolepsy: 0.66 (N = 3); RBD: 1.00 (N = 2)                                                                                                           | Mean Kappa of Insomnia disorder = 0.78<br><br>Mean Kappa of Sleep related breathing disorders = 0.94<br><br>Central Disorder of Hypersomnolence = 0.66<br><br>Parasomnia disorders = 1.00                                                                                                          |
| Merikangas et al. / 2014 / Sleep Medicine / USA | Multicentric (N = 2) (Sleep Disorder Center of Stanford University and Center of Sleep and Wake Disorders of Chevy Chase) | 6 Main Categories (Insomnia disorder, Central Disorder of Hypersomnolence, Sleep related breathing disorders, Sleep related movement disorders, Circadian rhythm sleep-wake disorders and Parasomnia disorders) | ICSD-2 (2005) | 2 | Sleep specialists and interviewers trained for the structured interview (N not reported) | Unstructured face-to-face interviews (sleep specialists) and structured telephone interviews with DISP (non-specialists)          | Automatically generated (with DISP) and by sleep specialists at the end of their interview       | No | Comparison of the sleep specialist diagnosis with the DISP diagnosis on 225 patients (N = 550 diagnosis conclusion)         | 8 | Kappa = Insomnia: 0.29 (N = 98); Hypersomnia: 0.41 (N = 69); Narcolepsy: 0.79 (N = 28); OSAS: 0.38 (N = 89); RLS: 0.20 (N = 14); RBD: 0.35 (N = 8); PLMD: 0.47 (N = 33); Delayed sleep phase disorder: 0.54 (N = 30) | Mean Kappa of Insomnia Disorders = 0.29<br><br>Mean Kappa of Central hypersomnolence Disorders = 0.41<br><br>Mean Kappa of Sleep related breathing Disorders = 0.38<br><br>Mean Kappa of Sleep related movement Disorders = 0.41<br><br>Mean Kappa of Circadian rhythm sleep-wake disorders = 0.54 |

|  |  |  |  |  |  |  |  |  |  |  |  |                                                 |
|--|--|--|--|--|--|--|--|--|--|--|--|-------------------------------------------------|
|  |  |  |  |  |  |  |  |  |  |  |  | Mean Kappa of<br>Parasomnia<br>disorders = 0.79 |
|--|--|--|--|--|--|--|--|--|--|--|--|-------------------------------------------------|

BIQ: Brief Insomnia Questionnaire  
 DISP: Diagnostic Interview for Sleep Patterns and Disorders  
 DSM: Diagnostic and Statistical Manual of Mental Disorders  
 GRRAS: Guidelines for Reporting Reliability and Agreement Studies  
 ICSD: International Classification of Sleep Disorders  
 ICD: International Classification of Diseases  
 SCISD: Structured Clinical Interview for DSM-5 Sleep-Disorders

\* Terminology relabeled according to the ICSD-3 classification.

The first group of methods (11/15 studies), designed as “test-retest reliability” methods, were to interviews a patient several times with a specific maximal time interval:

- **In green in the Table:** seven studies were based on the fact that a patient was interviewed by two interviewers (generally with a good level of expertise in sleep medicine), and reliability is calculated by comparing the Sleep-Wake disorders diagnosis done independently by different interviewers [18,24,26,28,30–32].
- **In blue in the Table:** four studies were based on the fact that a patient was interviewed independently at two different times, by a clinician and by an interviewer with a structured questionnaire. The clinician conducted an unstructured face-to-face [13,14] or semi-structured telephone interview [25,29].

The second group of methods (4/15 studies), designed as “joint interrater reliability” methods, were to apply diagnostic criteria by different clinician on the base of previous clinical data recordings:

- **In yellow in the Table:** two studies evaluated a single recording of a clinical interview between a patient and a sleep specialist (6 raters and 17 raters respectively – [33,34]), which was subsequently evaluated by several clinicians to estimate reliability.
- **In purple in the Table:** two studies were based on the fact that a patient was interviewed by an interviewer, which was subsequently evaluated by a clinician based on the recordings of the previous clinical interview [20,27].
