# Supplementary material for: A Systematic Review of Sleep–Wake Disorder Diagnostic Criteria Reliability Studies
Source: MDPI journal article supplement (doi:10.3390/biomedicines10071616), 2022-07-06
Supplement: s1 [file s1]

**Table S1.** Search equation built to include all sleep–wake disorders of the different versions of the ICSD, DSM, and ICD.

("sleep disorder\*" OR "Insomnia Disorder\*"OR "Sleep-related Breathing disorder\*" OR "Sleep Breathing disorder\*"OR "Central disorders of Hypersomnolence"OR "Circadian Rhythm Sleep Wake disorder\*"OR "Circadian Rhythm disorder\*"OR"Circadian disorder\*" OR "Parasomnia\*"OR "Sleep-related Movement disorder\*"OR "Sleep Movement disorder\*"OR "Obstructive Sleep Apnea" OR "Cheyne Stokes"OR "Central Sleep Apnea" OR "Obesity Hypoventilation syndrom\*"OR "Congenital Central Alveolar Hypoventilation Syndrom\*"OR "Late-Onset Central hypoventilation"OR "Idiopathic central alveolar hypoventilation"OR "Sleep related hypoxemia"OR "Narcolepsy"OR "Idiopathic hypersomnia"OR "Kleine Levin"OR "Insufficient Sleep syndrom\*"OR "Sleep Wake Phase Disorder\*"OR "Sleep Wake Rhythm Disorder\*"OR "Shift Work Disorder\*"OR "Jet lag disorder\*"OR "parasomnia" OR “Disorders of arousal” OR "Confusional arousal"OR "Sleepwalking"OR "Sleep Terror"OR "Sleep related eating disorder\*"OR"REM Sleep Behavior Disorder\*"OR “Sleep Behavior Disorder\*" OR "RBD" OR "Recurrent Isolated Sleep paralysis"OR "Nightmare Disorder\*"OR "Exploding head syndrom\*"OR "Sleep related Hallucination"OR "Sleep enuresis"OR "Restless Legs syndrom\*"OR "Periodic Limb Movement"OR "Sleep related Leg Cramps"OR "Sleep related Bruxism"OR "Sleep Bruxism" OR "Sleep related rhythmic movement disorder\*"OR "Sleep rhythmic movement disorder\*" OR "Benign Sleep Myoclonus" OR "Propriospinal Myoclonus at Sleep onset") AND ((reliability OR Kappa OR agreement) AND ((Sleep-EVAL) OR (criteria AND diagnos\*) OR (ICSD OR ICSD-\* OR DSM OR DSM-\* OR ICD OR ICD-\*)) OR “field trial”)
